1 **Exposure-Response to High PM<sub>2.5</sub> Levels for Cardiovascular Events in High-risk Older**  
2 **Adults in Taiwan**

3 Shu-Ping Huang MS<sup>1,2</sup>, Chien-Chou Su PhD<sup>3</sup>, Chuan-Yao Lin PhD<sup>4</sup>, Rachel Nethery PhD<sup>5</sup>,  
4 Kevin Josey PhD<sup>5</sup>, Benjamin Bates MD<sup>6,7</sup>, David Robinson PhD<sup>8</sup>, Poonam Gandhi MS<sup>6</sup>,  
5 Melanie Rua PharmD<sup>6</sup>, Ashwaghosha Parthasarathi MBBS<sup>6</sup>, Soko Setoguchi MD<sup>6,7</sup>, Yea-  
6 Huei Kao Yang BS Pharm<sup>2,9</sup>

7

8 *<sup>1</sup>Department of Pharmacy, Changhua Christian Hospital, Changhua, Taiwan*

9 *<sup>2</sup>Institute of Clinical Pharmacy and Pharmaceutical Sciences, College of Medicine, National*  
10 *Cheng Kung University, Tainan, Taiwan*

11 *<sup>3</sup>Clinical Innovation and Research Center, National Cheng Kung University Hospital,*  
12 *College of Medicine, National Cheng Kung University, Tainan, Taiwan*

13 *<sup>4</sup>Research Center for Environmental Changes, Academia Sinica, Taipei, Taiwan*

14 *<sup>5</sup>Department of Biostatistics, Harvard T.H. Chan School of Public Health, Boston, MA USA*

15 *<sup>6</sup>Rutgers University Institute for Health, Healthcare Policy, and Aging Research, New*  
16 *Brunswick, NJ USA*

17 *<sup>7</sup>Department of Medicine, Rutgers Robert Wood Johnson Medical School, One Robert Wood*  
18 *Johnson Pl., New Brunswick, NJ 08901*

19 *<sup>8</sup>Department of Geography, Rutgers University, New Brunswick, NJ USA*

20 *<sup>9</sup>Health Outcome Research Center, National Cheng Kung University, Tainan, Taiwan*

21

22 **Abstract**

23 Background: Multiple studies from countries with relatively lower PM<sub>2.5</sub> level demonstrated  
24 that acute and chronic exposure even at lower than recommended level, e.g., 9 µg/m<sup>3</sup> in the  
25 US increased the risk of cardiovascular (CV) events. However, limited studies using

**NOTE: This preprint reports new research that has not been certified by peer review and should not be used to guide clinical practice.**

26 individual level data exist from countries with a wider range of PM levels to illustrate shape  
27 of the exposure-response curve throughout the range including  $> 20 \mu\text{g}/\text{m}^3$  PM<sub>2.5</sub>  
28 concentrations. Taiwan with its policies reduced PM<sub>2.5</sub> over time provide opportunities to  
29 illustrate the dose response curves and how reductions of PM<sub>2.5</sub> over time correlated with CV  
30 events incidence in a nationwide sample.

31

32 Methods: Using data from the 2009-2019 Taiwan National Health Insurance Database linked  
33 to nationwide PM<sub>2.5</sub> data. We examined the shape and magnitude of the exposure-response  
34 curve between seasonal average PM<sub>2.5</sub> level and CV events-related hospitalizations among  
35 older adults at high-risk for CV events. We used history-adjusted marginal structural models  
36 including potential confounding by individual demographic factors, baseline comorbidities,  
37 and health service measures. To quantify the risk below and above  $20 \mu\text{g}/\text{m}^3$  we conducted  
38 stratified Cox regression. We also plotted PM<sub>2.5</sub> and CV events from 2009-2019 as well as  
39 average temperature as a comparison.

40

41 Findings: Using the PM<sub>2.5</sub> concentration  $<15 \mu\text{g}/\text{m}^3$  (Taiwan regulatory standard) as a  
42 reference, the seasonal average PM<sub>2.5</sub> concentration ( $15\text{-}23.5\mu\text{g}/\text{m}^3$  and  $> 23.5 \mu\text{g}/\text{m}^3$ ) were  
43 associated with hazard ration of 1.13 (95%CI 1.09-1.18) and 1.19 (95%CI 1.14-1.24), 1.07  
44 (95%CI 1.03-1.11) and 1.14 (95%CI 1.10-1.18), 1.22 (95%CI 1.08-1.38) and 1.31 (95%CI  
45 1.16-1.48), 1.04 (95%CI 0.98-1.10) and 1.10 (95%CI 1.04-1.16) respectively for HF,  
46 IS/TIA,PE/DVT and MI/ACS. A nonlinear relationship between PM<sub>2.5</sub> and CV events  
47 outcomes was observed at PM<sub>2.5</sub> levels above  $20 \mu\text{g}/\text{m}^3$ .

48

49 Interpretation: A nonlinear exposure-response relationship between PM<sub>2.5</sub> concentration  
50 and the incidence of cardiovascular events exists when PM<sub>2.5</sub> is higher than the levels

51 recommended by WHO Air Quality Guidelines. Further lowering PM<sub>2.5</sub> levels beyond  
52 current regulatory standards may effectively reduce the incidence of cardiovascular events,  
53 particularly HF and DVT, and can lead to tangible health benefits in high-risk elderly  
54 population.

55

56

## 57 **Introduction**

58 In recent years, the global cardiology communities have increasingly recognized air pollution  
59 as a critical factors for cardiovascular health. Particulate matter with a diameter of less than  
60 2.5 micrometers (PM<sub>2.5</sub>) is of particular concern due to its ability to penetrate deep into the  
61 lung tissue and enter the bloodstream, thereby posing significant risks to cardiovascular  
62 health. A growing body of evidence from multiple countries, predominantly those with  
63 relatively lower levels of PM<sub>2.5</sub>, has highlighted the adverse health effects associated with  
64 both acute and chronic exposure to PM<sub>2.5</sub> concentrations<sup>1-10</sup>, even at levels below the current  
65 standards recommended by various health organizations, such as the 9 µg/m<sup>3</sup> threshold set by  
66 the United States Environmental Protection Agency.

67

68 Despite the extensive research documenting the association between PM<sub>2.5</sub> exposure and an  
69 increased risk of cardiovascular events<sup>11-14</sup>, there remains a gap in our understanding the  
70 exposure-response relationship across a wider range of PM<sub>2.5</sub> concentrations in high-risk  
71 older adults. Most existing studies rely on aggregate data, which do not allow focusing on  
72 high risk groups defined by individual level factors such as having a chronic disease or age.

73

74 Taiwan presents a unique context for studying the effects of PM<sub>2.5</sub> on cardiovascular events.

75 Over recent years, Taiwan has implemented a series of policies aimed at reducing air

76 pollution, thereby offering an invaluable opportunity to investigate the dose-response

77 relationship between PM<sub>2.5</sub> exposure and CV events in a setting where environmental policies

78 have tangibly altered exposure levels over time. This study aims to leverage individual-level

79 data from a nationwide sample of high-risk older adults in Taiwan to explore how seasonal

80 exposure to moderate versus unhealthy levels of PM<sub>2.5</sub> concentrations correlates with the

81 incidence of CV events. Our study seeks to fill a critical gap in the literature by providing

82 empirical evidence from a region characterized by a wide range of PM<sub>2.5</sub> levels<sup>15</sup>, thereby  
83 offering a comprehensive understanding of the exposure-response curve throughout this  
84 spectrum.

85 The impacts of elevated levels of fine particulate matter (PM<sub>2.5</sub>, particles with diameter  $\leq 2.5$   
86  $\mu\text{m}$ ) on health outcomes have been continuously and extensively studied. In recent years,  
87 studies examining the relationship between PM<sub>2.5</sub> and health outcomes have utilized  
88 individual-level healthcare databases, deepening our understanding of the association  
89 between PM<sub>2.5</sub> exposure and mortality as well as various hospitalizations including  
90 cardiovascular (CV) events.

91

## 92 **Methods**

### 93 Data Sources

94 Our study used data from the Taiwan National Health Insurance Database (NHID) covering  
95 the period from 2009 to 2019. The NHID is a comprehensive health insurance program that  
96 provides coverage for 99.9% of the country's population. The database includes beneficiary  
97 registries, ambulatory care claims, inpatient claims, and prescription dispensing claims from  
98 pharmacies. Diagnosis codes based on the International Classification of Diseases, Ninth  
99 Edition, Clinical Modification (ICD-9-CM) and Tenth Edition, Clinical Modification (ICD-  
100 10-CM) were used to identify outcomes and comorbidities, along with National Health  
101 Insurance Codes identifying procedures and drug treatment. A more detailed description of  
102 the NHID has been reported elsewhere.<sup>16</sup>

103

### 104 Cohort Definition

105 The study cohort consisted of patients with chronic conditions who are at high risk for CV  
106 events, including patients with atrial fibrillation (AF), heart failure (HF), carotid stenosis,

107 coronary artery disease (CAD), cancer, peripheral vascular disease (PVD), cerebrovascular  
108 accidents (CVA), and venous thromboembolisms (VTE), as well as those who underwent  
109 recent total hip or knee arthroplasty (THA or TKA). These conditions were identified from  
110 inpatient records based on at least one code within the 12 months preceding the index date.  
111 The index date referred to the first outpatient or inpatient medical record between 2009 and  
112 2018 in the NHID for individuals aged 65 years or older. For THA/TKA, the index date was  
113 determined as the first hospital discharge date by a post-orthopedic or major surgery inpatient  
114 code (81·54, 81·51). A detailed definition of the high-risk cohort is available in Table S-1.

115

#### 116 Cardiovascular Events

117 Cardiovascular (CV) events were defined as events with at least one inpatient diagnosis  
118 identified by an ICD-9/10 code in the first or second position. The five CV events measured  
119 in the study were acute coronary syndrome (including myocardial infarction) (ACS/MI),  
120 ischemic stroke/transient ischemic attack (IS/TIA), atrial fibrillation (AF), deep vein  
121 thrombosis (DVT), and heart failure (HF). Specific criteria and details of the CV events  
122 definitions are provided in Table S-2 of the Supplemental Material. The date of the outcome  
123 event was recorded as the first date of diagnosis after the index date. Censoring occurred due  
124 to death, end of the study period, or loss of National Health Insurance eligibility

125

#### 126 Seasonal PM<sub>2.5</sub> Exposure

127 Seasonal average PM<sub>2.5</sub> concentrations were obtained from the Data Bank for Atmospheric  
128 and Hydrologic Research and linked to the NHID based on postcode. The seasons of Winter,  
129 Spring, Summer, and Fall were defined as occurring from December to February, March to  
130 May, June to August, and September to November, respectively. Nationwide estimates of  
131 seasonal average PM<sub>2.5</sub> concentrations were calculated based on hourly data collected at 85

132 monitoring stations. Hourly PM<sub>2.5</sub> concentrations were then averaged within each  
133 combination of postcode and seasons to obtain postcode-level seasonal average  
134 concentrations. For areas with no monitoring station, the PM<sub>2.5</sub> concentration at the nearest  
135 monitoring station was used.

136 To identify each patient's postcode of residence, we employed a residence estimation  
137 algorithm developed by Lin et al.,<sup>17</sup> which had been validated against census data (Pearson  
138 correlation coefficient 0.960). The rule of residence estimation was based on the  
139 classification of beneficiaries in the NHI program and the location of hospital or clinic visits.

140 This estimation was composed of four steps: (1) if the employment status of a beneficiary  
141 belongs to a certification requiring a professional license (such as accountant, lawyer, health  
142 care personnel), farmers, fishermen, veterans, or low-income citizens, whose residence can be  
143 designated as identical to the one registered in the NHI registry, as professional practice or  
144 veteran, and social benefit is restricted to the location of a city or county. The employment  
145 status can be identified from the database of beneficiary registry with the code numbers of "2  
146 (62 prior to 2006)," "3," "5," or "6"; (2) for those who did not belong to the above categories,  
147 we retrieved the ambulatory care for upper respiratory tract infection (URI) in NHID, and  
148 assigned the location of hospital/clinic they visited as their residence area; (3) if the persons  
149 had no records for ambulatory URI, we checked for other ambulatory visits in the  
150 hospital/clinic and selected the one with highest visits as their residence location; (4) for  
151 those who had no claims record of ambulatory care other than the six defined chronic  
152 illnesses, the residence information in the most recent registry was considered to be their  
153 residence location. The residence estimation algorithm is shown in Figure S-1, which shows  
154 the validated results of residence estimation positive predictive value (PPV) by linking NHID  
155 and the National Health Interview Survey (NHIS). The overall residence estimation PPV was  
156 84.3%.<sup>18</sup>

157 Covariates

158 Demographics including age, sex, and insurance premium (a proxy for socioeconomic status)  
159 were obtained from the NHID. Information on the presence or absence of baseline  
160 comorbidities and health behaviors was obtained using outpatient and inpatient diagnosis  
161 codes from the NHID. These variables were considered as time-invariant confounders (see  
162 Table S-3 in the Supplemental Material). Measures of healthcare utilization during the  
163 baseline period including the number of hospitalizations, total hospitalization days, number  
164 of emergency department visits, number of outpatient visits, and number of medications  
165 dispensed were also taken from the NHID. Region of residence, season, and year were treated  
166 as time-varying confounders.

167

168 Statistical Analysis

169 Descriptive statistics were used to summarize baseline characteristics, with continuous  
170 variables presented as means with standard deviations (SD) and categorical variables as  
171 counts and proportions. The incidence of CV events was calculated as the number of cases  
172 divided by the number of individuals in the cohort by season.

173

174 Age- and sex-adjusted incidence was estimated using Poisson regression. Marginal structural  
175 Cox models (MSM), which adjust for confounding through inverse probability of exposure  
176 weights (IPWs), were fit separately for each type of CV events hospitalization in order to  
177 estimate the effect of PM<sub>2.5</sub> on the time to the first event. Following the approach used by our  
178 prior study<sup>17</sup> the MSM in this study estimated the effect of PM<sub>2.5</sub> exposure at a specific time  
179 point per season rather than the cumulative exposure history up to that point, as in standard  
180 MSM. Random forest models fit to the PM<sub>2.5</sub> measurements, with all confounding variables  
181 as predictors, were used to estimate the IPWs for each person-season. The estimated IPWs



182 were stabilized and truncated at the 1<sup>st</sup> and 99<sup>th</sup> percentiles. To adjust for death as a  
183 competing event, censoring-by-death weights (CDWs) were also estimated by fitting a  
184 random forest to an indicator of death, with PM<sub>2.5</sub> and the confounders as predictors. CDWs  
185 were also stabilized and truncated. The final inverse probability weights deployed in the  
186 MSMs were generated by multiplying the IPWs and CDWs for each person-season.

187

188 To illustrate the exposure-response curves, we first conducted an inverse probability weighted  
189 Cox regression with a restricted cubic spline on PM<sub>2.5</sub>. For the restricted cubic spline models,  
190 we plot the estimated spline curves across the range of observed PM<sub>2.5</sub> concentrations to  
191 evaluate the shape of the exposure-response curve for each outcome, with 15 µg/m<sup>3</sup> – the  
192 Taiwan Environmental Protection Agency air quality standard concentration of PM<sub>2.5</sub> – used  
193 as the reference PM<sub>2.5</sub> level. To quantify the impact of PM<sub>2.5</sub> on CV events at moderate vs.  
194 high levels, we estimated hazard ratio of average seasonal PM<sub>2.5</sub> level of moderate (15-  
195 23.5ug/m<sup>3</sup>) and high (> 23.5 ug/m<sup>3</sup>) using PM<sub>2.5</sub> level < 15ug/m<sup>3</sup> as reference.

196

197 All statistical analyses were conducted using SAS 9.4 (SAS Institute Inc., Cary, NC, USA)  
198 and R software (version 4.2.1). The study was approved by the National Cheng Kung  
199 University Hospital Institutional Review Board (IRB no: B-EX-108-056).

200

## 201 **Results**

202 Among 373,402 older adults with high-risk conditions in Taiwan, the average age was 73.6  
203 years, and 57.7% of cohort members were female with the majority with hypertension (72%)  
204 or osteoarthritis (58%). The mean PM<sub>2.5</sub> concentration observed in our study was 28.3 µg/m<sup>3</sup>  
205 (standard deviation 17.4 µg/m<sup>3</sup>) (Table 1). The median PM<sub>2.5</sub> concentration during the study  
206 period was 23.5 µg/m<sup>3</sup> with minimum of 0.1 µg/m<sup>3</sup> and maximum of 72.65 µg/m<sup>3</sup> with

207 significant seasonal variation (Figure 1).

208

209 Figure 2 shows the time series of seasonal PM<sub>2.5</sub> concentrations and the age- and sex-adjusted

210 incidence rates of the five CV events (DVT, ACS/MI, HF, IS/TIA, and AF). PM<sub>2.5</sub> levels

211 showed clear seasonal patterns and declined gradually over time. Incidence of HF and IS/TIA

212 were high among Taiwanese older adults with a range of 0.2-2.7% and 0.2-1%, respectively.

213 The age and sex-adjusted incidence of HF, ACS/MI, DVT/PE and IS/TIA have also declined

214 over time with HF and ACS/MI showing clear seasonal patterns synchronous with PM<sub>2.5</sub>

215 concentrations.

216

217 Restricted cubic spline curves showed that the risk of HF, DVT, IS/TIA, and ACS/MI all

218 increased as PM<sub>2.5</sub> concentrations increased (Figure 3). For DVT and HF, the slope of the

219 curve was steeper at concentrations below 20  $\mu\text{g}/\text{m}^3$  and leveled off at higher concentrations.

220 The curve for IS/TIA was linear up to at approximately 45  $\mu\text{g}/\text{m}^3$  before it started to level off.

221 For ACS/MI, the slope was less steep at lower concentrations but more steep at higher PM<sub>2.5</sub>

222 concentration, approximately at 35  $\mu\text{g}/\text{m}^3$ . We observed no between PM<sub>2.5</sub> concentrations and

223 AF.

224

225 Compared to the PM<sub>2.5</sub> concentration  $<15 \mu\text{g}/\text{m}^3$  (the current Taiwan regulatory standard) as a

226 reference, the adjusted hazard ratio (HR) for moderate ( $15\text{-}23.5\mu\text{g}/\text{m}^3$ ) on HF, IS/TIA, and

227 PE/DVT were 1.13 (95%CI 1.09-1.18), 1.07 (95%CI 1.03-1.11), and 1.22 (95%CI 1.08-1.38),

228 respectively (Figure 4) but was much smaller and not statistically significant for MI/ACS

229 (HR=1.04, 95%CI 0.98-1.10). HR for PM<sub>2.5</sub> on AF was almost null. The adjusted HR for

230 high ( $> 23.5\mu\text{g}/\text{m}^3$ ) on HF, IS/TIA, PE/DVT and MI/ACS were 1.19 (95%CI 1.14-1.24), 1.14

231 (95%CI 1.10-1.18), 1.31 (95%CI 1.16-1.48) and 1.10 (95%CI 1.04-1.16), respectively. These

232 findings were consistent with the exposure-response curves illustrated by cubic spline curves  
233 in Figure 3.

234

## 235 **Discussion**

236 In the national sample of older adults in Taiwan, we observed a decrease over time in both air  
237 pollution (PM<sub>2.5</sub>) levels and the age and gender adjusted rates of CV events from 2009-2019,  
238 with HF and MI/ACS showing clear seasonal changes that matched the PM<sub>2.5</sub> patterns.

239 Among older adults with high-risk conditions for CV events and frequent exposure to high  
240 levels of PM<sub>2.5</sub> in Taiwan, we observed non-linear exposure response relationship between  
241 PM<sub>2.5</sub> and CV events. For DVT, HF, and IS/TIA, exposure to PM<sub>2.5</sub> was associated with  
242 elevated risk of DVT, HF, IS/TIA with steeper slopes of the PM<sub>2.5</sub> exposure-response curves  
243 at lower exposure levels. For MI/ACS, in contrast, the PM<sub>2.5</sub> effect was more pronounced at  
244 higher exposure level.

245

246 The incidence of CV events in Taiwan and the levels of PM<sub>2.5</sub> both exhibited decreasing  
247 trends over time. In previous literature, decreasing trends of incidences of HF and strokes  
248 were reported during 2010-2015<sup>19</sup> and 2004-2011<sup>20</sup>, respectively, while AMI incidence  
249 remained constant during 2009-2015<sup>21-22</sup>. The patterns of our findings are consistent with  
250 results from previous studies that have reported improvements in air quality due to the  
251 implementation of various air pollution control measures in Taiwan over the past several  
252 decades.<sup>23</sup> For instance, Taiwan's Air Pollution Control Act, which has been continuously  
253 strengthened since its introduction in 1975, has played a significant role in regulating and  
254 reducing air pollution levels. The Air Pollution Prevention and Control Strategy, implemented  
255 since 2017, has further contributed to air quality improvement through a combination of  
256 incentives and constraints.

257 American Heart Association (AHA) scientific statement on PM air pollution and  
258 cardiovascular disease in 2010 concluded that PM<sub>2.5</sub> increases the risk of cardiovascular  
259 events and death, but there are few quantitative summaries available that synthesize and  
260 compare the magnitudes of these effects. A meta-analysis which included 42 studies, focus on  
261 long-term PM<sub>2.5</sub> exposure and risks of ischemic heart disease and stroke events shows that  
262 long-term PM<sub>2.5</sub> exposure is associated with increased risks of IHD mortality, cerebrovascular  
263 mortality, and incident stroke. However, this study does not provide the level of PM<sub>2.5</sub> and  
264 assumes that the effect of PM<sub>2.5</sub> exposure on CV risk is linear.<sup>24</sup>

265

266 Our spline models enabled us to characterize the shape of the relationships between PM<sub>2.5</sub>  
267 and each CV events across exposure levels ranging from 0.1 µg/m<sup>3</sup> to 72.65µg/m<sup>3</sup>. For DVT,  
268 HF, MI/ACS and AF, a plateau was observed in the curve between levels of 20 µg/m<sup>3</sup> and 40  
269 µg/m<sup>3</sup>. At PM<sub>2.5</sub> concentrations below 20µg/m<sup>3</sup>, increasing PM<sub>2.5</sub> exposure was associated  
270 with increased risk of DVT, HF, MI/ACS and AF. Conversely, above 20 µg/m<sup>3</sup>, there were  
271 smaller positive but not statistically significant associations between PM<sub>2.5</sub> concentrations  
272 and most CV events. This provides important evidence about the complex non-linear  
273 relationships between PM<sub>2.5</sub> exposure and CV events at higher PM<sub>2.5</sub> concentrations. Our  
274 study showed biphasic concentration-response relationships between PM<sub>2.5</sub> levels and CV  
275 events. This pattern is consistent with results from studies conducted in areas with high PM<sub>2.5</sub>  
276 levels,<sup>25-28</sup> as well as with the American Heart Association's consensus that associations  
277 between PM<sub>2.5</sub> concentration and CV events risk appear to be monotonic below 15 µg/m<sup>3</sup>.<sup>11</sup>

278

279 Our results differ somewhat from those of Lo et al., who investigated the association between  
280 PM<sub>2.5</sub> and cardiopulmonary disease in the Taiwanese population.<sup>29</sup> They found that each 10  
281 µg/m<sup>3</sup> increase in 5-year average exposure to PM<sub>2.5</sub> was associated with a 4.8% increased

282 risk of incident ischemic heart disease (95% confidence interval [CI] -3·3, 13·6) and a 3·9%  
283 increased risk of incident stroke (95% confidence interval [CI] -2·9, 11·1). However, they did  
284 not detect any evidence of non-linearity for most outcomes examined, with the exception of  
285 ischemic heart disease. However, Lo et al. used 5-year average PM<sub>2.5</sub> concentrations whereas  
286 we used more granular, seasonal average values. PM<sub>2.5</sub> concentrations vary substantially by  
287 season and by year in Taiwan as shown in our analyses. Thus, seasonal averages reflect  
288 patient exposures to fine PM more precisely than 5-year averages. Also, the study populations  
289 are different between the two studies; Taiwan National Health Interview Survey (62,694  
290 individuals from general older adults) in Lo et al. vs. NHID (373,402 individuals who are at  
291 high risk for CV events). Our study population was larger, more nationally representative but  
292 also focused on high risk individuals.

293

294 The mechanisms by which PM<sub>2.5</sub> influences cardiovascular outcomes involve both direct and  
295 indirect pathways. Animal studies have demonstrated that PM<sub>2.5</sub> can be directly distributed  
296 through the bloodstream to remote target organs, leading to local oxidative stress,  
297 inflammation, and atherosclerotic plaques, ultimately resulting in thrombus formation.<sup>30</sup>  
298 Indirectly, PM<sub>2.5</sub> deposited in the lungs can trigger oxidative stress and inflammation, leading  
299 to increased circulating levels of pro-inflammatory cytokines, a known risk factor for  
300 atherosclerosis.<sup>11,25</sup> A study conducted in Beijing found that exposure to higher levels of air  
301 pollution led to acute inflammatory and prothrombotic response in the early lag period,  
302 followed by a gradual decrease in effect over time, potentially due to compensatory  
303 mechanisms.<sup>26</sup>

304

305 Our study utilized seasonal average exposures in part to provide actionable insights for policy  
306 makers, clinicians and individuals. This approach was chosen in light of distinct and

307 predictable seasonal patterns in PM<sub>2.5</sub> concentrations, which offer opportunities for clinicians  
308 to advise high-risk patients regarding exposure reduction during periods of elevated ambient  
309 PM<sub>2.5</sub> levels, As the high-risk individuals in our study had multiple outpatient visits per  
310 season, clinicians can prescribe personal air purifiers and frequent use, and/or recommend  
311 limiting outdoor activities during seasons with high ambient PM<sub>2.5</sub>.<sup>15</sup>

312

313 Several limitations to our study should be noted. First, exposure data were obtained from  
314 fixed monitoring stations, and patient residence was indirectly estimated from claims data,  
315 introducing the potential for exposure misclassification. To mitigate this bias, we used the  
316 most frequently visited clinic as a surrogate for patient residence. Additionally, the lack of  
317 socioeconomic data in the NHID limited our ability to account for individual-level measures  
318 taken to mitigate air pollution exposure, such as the use of air purifiers or reducing outdoor  
319 exposure during periods of poor air quality. The use of air purifiers in Taiwan was about 10%  
320 between 2009 and 2014, increasing from 11% to 23% between 2015 and 2019<sup>31</sup>. We were  
321 able to address this limitation to some extent by using insurance premium (which reflects  
322 income) as a proxy for health behavior.

323

324 In conclusion, our study contributes to the existing knowledge regarding PM<sub>2.5</sub> and  
325 cardiovascular events by demonstrating nonlinear exposure- response relationship between  
326 PM<sub>2.5</sub> concentrations and incidence of CV events underscores the importance of reducing  
327 PM<sub>2.5</sub> levels even below the current regulatory standard of 15 µg/m<sup>3</sup> and the potential for  
328 such a policy change to effectively decrease the incidence of DVT and HF further in high-risk  
329 individuals. Accordingly, further reduction of PM<sub>2.5</sub> levels beyond Taiwan's regulatory  
330 standards (<15 µg/m<sup>3</sup>) may effectively reduce the incidence of DVT and HF. We also showed  
331 that the incidence of most CV events and PM<sub>2.5</sub> concentrations in Taiwan fell significantly

332 between 2009 and 2019, supporting the potential effectiveness of comprehensive air pollution  
333 control measures.

334

335 **Acknowledgments:** Funding for this study was provided by the National Institute on Aging,  
336 National Institutes of Health (R01 #1R01AG060232-01A1). Gabriel D. Shapiro provided  
337 editorial support for this manuscript and was paid by Rutgers University.

338

339 **Sources of Funding:** This study was funded by the National Institutes of Health (NIA R01  
340 #1R01AG060232-01A1).

341

342 **Disclosures:** The authors declare that they have no competing interests.

343

344 **Contributors:** Conceptualization (AV, SS, DR), data curation (SH, CS), formal analysis (SH,  
345 CS), funding acquisition (SS), investigation (DR, RN, SS), methodology (RN, KJ, SS, CS,  
346 CL), project administration (SS, MR), resources (YY), software (CS), supervision (DR, SS,  
347 RN, BB, YY), validation (SS, BB, YY), visualization (SH, CS), writing – original draft (SH,  
348 CS), writing – review and editing (all authors)

349

350 **Data Sharing:** The datasets generated and analyzed for the conduct of this study are not  
351 publicly available and are restricted to authorized users of the Taiwan Health and Welfare  
352 Data Science Center .

353

354

355

356

357 **References**

- 358 1. Lelieveld J, Pozzer A, Pöschl U, Fnais M, Haines A, Münzel T. Loss of life expectancy  
359 from air pollution compared to other risk factors: a worldwide perspective.  
360 *Cardiovascular Research*. 2020; 116 (11):1910–1917.
- 361 2. Park S, Allen RJ, Lim CH. A likely increase in fine particulate matter and premature  
362 mortality under future climate change. *Air Qual Atmosphere Health*. 2020;13(2):143-  
363 151.
- 364 3. Di Q, Dai L, Wang Y, Zanobetti A, Choirat C, Schwartz JD, Dominici F. Association of  
365 Short-term Exposure to Air Pollution With Mortality in Older Adults. *JAMA*.  
366 2017;318(24):2446-2456.
- 367 4. Di Q, Wang Y, Zanobetti A, Wang Y, Koutrakis P, Choirat C, Dominici F, Schwartz D.  
368 Air Pollution and Mortality in the Medicare Population. *N Engl J Med*.  
369 2017;376(26):2513-2522.
- 370 5. Wang B, Eum KD, Kazemiparkouhi F, Li C, Manjourides J, Pavlu V, Suh H. The  
371 impact of long-term PM<sub>2.5</sub> exposure on specific causes of death: exposure-response  
372 curves and effect modification among 53 million U.S. Medicare beneficiaries. *Environ*  
373 *Health*. 2020;19(1):20.
- 374 6. Wei Y, Yazdi MD, Di Q, Requia WJ, Dominici F, Zanobetti A, Schwartz J. Emulating  
375 causal dose-response relations between air pollutants and mortality in the Medicare  
376 population. *Environ Health*. 2021;20(1):53.
- 377 7. Wu X, Braun D, Schwartz J, Kioumourtzoglou MA, Dominici F. Evaluating the impact  
378 of long-term exposure to fine particulate matter on mortality among the elderly. *Sci Adv*.  
379 Published online June 26, 2020:eaba5692.
- 380 8. Chen J, Hoek G. Long-term exposure to PM and all-cause and cause-specific mortality:  
381 A systematic review and meta-analysis. 2020;143:105974.



- 382 9. Rhee J, Dominici F, Zanobetti A, Schwartz J, Wang Y, Di Q, Balmes J, Christiani DC.  
383 Impact of Long-Term Exposures to Ambient PM<sub>2.5</sub> and Ozone on ARDS Risk for Older  
384 Adults in the United States. *Chest*. 2019;156(1):71-79.
- 385 10. Yitshak-Sade M, Bobb JF, Schwartz JD, Kloog I, Zanobetti A. The association between  
386 short and long-term exposure to PM<sub>2.5</sub> and temperature and hospital admissions in New  
387 England and the synergistic effect of the short-term exposures. *Sci Total Environ*.  
388 2018;639:868-875.
- 389 11. Brook RD, Rajagopalan S, Pope CA 3rd, Brook JR, Bhatnagar A, Diez-Roux AV,  
390 Holguin F, Hong Y, Luepker RV, Mittleman MA, et al. Particulate matter air pollution  
391 and cardiovascular disease: An update to the scientific statement from the American  
392 Heart Association. *Circulation*. 2010;121(21):2331-78.
- 393 12. Pope CA 3rd, Burnett RT, Turner MC, Cohen A, Krewski D, Jerrett M, Gapstur SM,  
394 Thun MJ. Lung cancer and cardiovascular disease mortality associated with ambient air  
395 pollution and cigarette smoke: shape of the exposure-response relationships. *Environ*  
396 *Health Perspect*. 2011;119(11):1616-1621.
- 397 13. Dominici F, Peng RD, Bell ML, Pham L, McDermott A, Zeger SL, Samet JM. Fine  
398 Particulate Air Pollution and Hospital Admission for Cardiovascular and Respiratory  
399 Diseases. *JAMA*. 2006;295(10):1127-1134.
- 400 14. Joshi SS, Miller MR, Newby DE. Air pollution and cardiovascular disease: the Paul  
401 Wood Lecture, British Cardiovascular Society 2021. *Heart*. 2022;108:1267–1273.
- 402 15. Nethery RC, Josey K, Gandhi P, Kim JH, Visaria A, Bates B, Schwartz J, Robinson D,  
403 Setoguchi S. Air Pollution and Cardiovascular and Thromboembolic Events in Older  
404 Adults With High-Risk Conditions. *American Journal of Epidemiology*  
405 2023;192(8):1358-1370. <https://doi.org/10.1093/aje/kwad089>

- 406 16. Hsieh CY, Su CC, Shao SC, Sung SF, Lin SJ, Kao YH, Lai CC. "Taiwan's national  
407 health insurance research database: past and future." *Clinical epidemiology* 11 (2019):  
408 349.
- 409 17. Lin MH, Yang AC, Wen TH. Using regional differences and demographic  
410 characteristics to evaluate the principles of estimation of the residence of the population  
411 in National Health Insurance Research Databases (NHIRD). *Taiwan Journal of Public*  
412 *Health*. 2011;30(4):347.
- 413 18. Su CC, Lee KJ., Yen CT. Wu LH, Huang CH, Lu MZ, Cheng CL. Use of spatial panel-  
414 data models to investigate factors related to incidence of end-stage renal disease: a  
415 nationwide longitudinal study in Taiwan. *BMC Public Health* 23, 247 (2023).  
416 <https://doi.org/10.1186/s12889-023-15189-7>
- 417 19. Wang TD, Huang ST, Wang CY, Lin FJ, Chen HM, Hsiao FY. Nationwide trends in  
418 incidence, healthcare utilization, and mortality in hospitalized heart failure patients in  
419 Taiwan. *ESC Heart Fail*. 2020 Dec;7(6):3653-3666. doi: 10.1002/ehf2.12892. Epub  
420 2020 Sep 13. PMID: 32924330; PMCID: PMC7755001.
- 421 20. Tsai CF, Wang YH, Teng NC, Yip PK, Chen LK. Incidence, subtypes, sex differences  
422 and trends of stroke in Taiwan. *PLoS One*. 2022 Nov 16;17(11):e0277296. doi:  
423 10.1371/journal.pone.0277296. PMID: 36383604; PMCID: PMC9668115.
- 424 21. Lee CH, Cheng CL, Yang YH, Chao TH, Chen JY, Liu PY, Lin CC, Chan SH, Tsai LM,  
425 Chen JH, Lin LJ, Li YH. Trends in the incidence and management of acute myocardial  
426 infarction from 1999 to 2008: get with the guidelines performance measures in Taiwan.  
427 *J Am Heart Assoc*. 2014 Aug 11;3(4):e001066. Doi: 10.1161/JAHA.114.001066. PMID:  
428 25112555; PMCID: PMC4310397.

- 429 22. Lee CH, Fang CC, Tsai LM, Gan ST, Lin SH, Li YH. Patterns of Acute Myocardial  
430 Infarction in Taiwan from 2009 to 2015. *Am J Cardiol.* 2018 Dec 15;122(12):1996-  
431 2004. doi: 10.1016/j.amjcard.2018.08.047. Epub 2018 Sep 13. PMID: 30301543.
- 432 23. Hung, Cw., Shih, MF. Air quality changes in Taiwan over the past decades and during  
433 the COVID-19 crisis. *Terr Atmos Ocean Sci* 34, 5 (2023).  
434 <https://doi.org/10.1007/s44195-023-00036-4>
- 435 24. Alexeeff SE, Liao NS, Liu X, Van Den Eeden SK, Sidney S. Long-Term PM2.5  
436 Exposure and Risks of Ischemic Heart Disease and Stroke Events: Review and Meta-  
437 Analysis. *J Am Heart Assoc.* 2021 Jan 5;10(1):e016890. doi:  
438 10.1161/JAHA.120.016890. Epub 2020 Dec 31. PMID: 33381983; PMCID:  
439 PMC7955467.
- 440 25. Hamanaka RB, Mutlu GM. Particulate Matter Air Pollution: Effects on the  
441 Cardiovascular System. *Front Endocrinol (Lausanne).* 2018 Nov 16;9:680. doi:  
442 10.3389/fendo.2018.00680. PMID: 30505291; PMCID: PMC6250783.
- 443 26. Xie W, Li G, Zhao D, Xie X, Wei Z, Wang W, Wang M, Li G, Liu W, Sun J, Jia Z,  
444 Zhang Q, Liu J. Relationship between fine particulate air pollution and ischaemic heart  
445 disease morbidity and mortality. *Heart.* 2015 Feb;101(4):257-63. doi: 10.1136/heartjnl-  
446 2014-306165. Epub 2014 Oct 23. PMID: 25341536.
- 447 27. Apte JS, Marshall JD, Cohen AJ, Brauer M. Addressing global mortality from ambient  
448 PM2.5. *Environ Sci Technol.* (2015) 49:8057–66. doi: 10.1021/acs.est.5b01236
- 449 28. Pope CA III, Burnett RT, Krewski D, Jerrett M, Shi Y, Calle EE, Thun MJ.  
450 Cardiovascular mortality and exposure to airborne fine particulate matter and cigarette  
451 smoke: shape of the exposure-response relationship. *Circulation* (2009) 120:941–8. doi:  
452 10.1161/CIRCULATIONAHA.109.857888

- 453 29. Lo WC, Ho CC, Tseng E, Hwang JS, Chan CC, Lin HH. Long-term exposure to ambient  
454 fine particulate matter (PM<sub>2.5</sub>) and associations with cardiopulmonary diseases and lung  
455 cancer in Taiwan: a nationwide longitudinal cohort study *International Journal of*  
456 *Epidemiology*, 2022, 1230–1242.
- 457 30. Du Y, Xu X, Chu M, Guo Y, Wang J. Air particulate matter and cardiovascular disease:  
458 the epidemiological, biomedical and clinical evidence. *J Thorac Dis.* 2016;8(1):E8-E19.
- 459 31. National Statistics Republic of China (Taiwan). Report on The Survey of Family Income  
460 and Expenditure. National Statistics Republic of China (Taiwan); 2024. Accessed April  
461 19, 2024. <https://eng.stat.gov.tw/News.aspx?n=4218&sms=11711>
- 462

463 **Table 1. Baseline characteristics of the high CV events risk cohort (N=373,402)**

|                                                                                  | Mean (or N) | SD (or %) |
|----------------------------------------------------------------------------------|-------------|-----------|
| <b>Exposure</b>                                                                  |             |           |
| PM <sub>2.5</sub> µg/m <sup>3</sup>                                              | 28·31       | 17·41     |
| <b>Individual Characteristics</b>                                                |             |           |
| Age                                                                              | 73·61       | 7·22      |
| Male                                                                             | 157948      | 42·3      |
| <b>Area-Level Characteristics</b>                                                |             |           |
| Population density                                                               | 2494·95     | 3187·88   |
| National Health Insurance premium                                                | 22907·41    | 20382·02  |
| <b>Individual Comorbidities, Behavioral<br/>Risk Factors, and Health Service</b> |             |           |

---

| <b>Measures</b>                                              |        |       |
|--------------------------------------------------------------|--------|-------|
| Smoking                                                      | 838    | 0·22  |
| Obesity                                                      | 1345   | 0·36  |
| Diabetic nephropathy                                         | 23400  | 6·27  |
| Diabetic neuropathy                                          | 13813  | 3·7   |
| Diabetes retinopathy                                         | 7321   | 1·96  |
| Diabetes with peripheral circulatory disorders               | 5328   | 1·43  |
| Diabetes overall (uncomplicated + complicated; Type I or II) | 129975 | 34·81 |
| Hypertension                                                 | 272363 | 72·94 |
| Hypercholesterolemia                                         | 116000 | 31·07 |
| Stroke                                                       | 68782  | 18·42 |
| Transient ischemic attack                                    | 20681  | 5·54  |
| Myocardial infarction                                        | 13096  | 3·51  |
| Heart failure                                                | 70066  | 18·76 |
| Chronic kidney disease                                       | 30167  | 8·08  |
| Renal insufficiency (non-CKD related)                        | 22847  | 6·12  |
| Stable angina                                                | 29725  | 7·96  |
| Unstable angina                                              | 18426  | 4·93  |
| Other ischemic heart disease                                 | 93347  | 25    |
| Peripheral vascular disease                                  | 10502  | 2·81  |
| Atrial fibrillation                                          | 33885  | 9·07  |
| Other dysrhythmias                                           | 42987  | 11·51 |
| Cardiac conduction disorder                                  | 3844   | 1·03  |

---

---

|                                                         |       |       |
|---------------------------------------------------------|-------|-------|
| Other cardiovascular diseases                           | 23647 | 6·33  |
| Asthma                                                  | 34232 | 9·17  |
| Chronic obstructive pulmonary disease                   | 38641 | 10·35 |
| Chronic pulmonary disease (includes<br>bronchiectasis)  | 59130 | 15·84 |
| Obstructive sleep apnea                                 | 194   | 0·05  |
| Pneumonia                                               | 47709 | 12·78 |
| Acute renal disease                                     | 9222  | 2·47  |
| Chronic renal insufficiency                             | 43336 | 11·61 |
| Edema                                                   | 29899 | 8·01  |
| Liver disease                                           | 65157 | 17·45 |
| Hypothyroidism                                          | 5560  | 1·49  |
| Hyperthyroidism                                         | 4487  | 1·2   |
| Depression                                              | 22211 | 5·95  |
| Anxiety                                                 | 43833 | 11·74 |
| Sleep disorder                                          | 69053 | 18·49 |
| Dementia                                                | 28312 | 7·58  |
| Psychosis                                               | 4353  | 1·17  |
| Obesity                                                 | 1640  | 0·44  |
| Smoking                                                 | 2178  | 0·58  |
| Alcohol use                                             | 2763  | 0·74  |
| Drug abuse                                              | 807   | 0·22  |
| Congenital anomalies of the heart and<br>great arteries | 1055  | 0·28  |
| Cardiomyopathy                                          | 3957  | 1·06  |

---

---

|                                                |        |       |
|------------------------------------------------|--------|-------|
| Ventricular arrhythmia                         | 1887   | 0·51  |
| Disorders of mineral and electrolyte imbalance | 32119  | 8·6   |
| Diarrhea                                       | 23142  | 6·2   |
| Hyperparathyroidism                            | 731    | 0·2   |
| Angioneurotic edema                            | 184    | 0·05  |
| Diseases and dysfunctions of GI/GU             | 183849 | 49·24 |
| Food allergy                                   | 1265   | 0·34  |
| Drug allergy                                   | 4025   | 1·08  |
| Glaucoma                                       | 1635   | 0·44  |
| Myocarditis                                    | 183    | 0·05  |
| Neutropenia                                    | 3311   | 0·89  |
| Cancer                                         | 102415 | 27·43 |
| Epilepsy                                       | 2902   | 0·78  |
| HIV                                            | 58     | 0·02  |
| Anemias                                        | 63297  | 16·95 |
| Any mental disorder                            | 110321 | 29·54 |
| Bipolar disorder                               | 2093   | 0·56  |
| Dyskinesia                                     | 15     | 0     |
| Diverticulosis of intestine                    | 2063   | 0·55  |
| Pancreatitis                                   | 2649   | 0·71  |
| Osteoarthritis                                 | 215556 | 57·73 |
| Disc disorder                                  | 29296  | 7·85  |
| Hip fracture                                   | 8411   | 2·25  |
| Self-harm                                      | 26     | 0·01  |

---

---

|                                       |       |       |
|---------------------------------------|-------|-------|
| Number of outpatient visits           | 36·09 | 21·82 |
| Number of hospital visits             | 1·74  | 1·61  |
| Days hospitalized                     | 15·82 | 25·54 |
| Number of emergency department visits | 1·01  | 1·65  |
| Number of medications dispensed       | 13·58 | 5·79  |

---

464

465 Figure 1 Maps of postcode-level seasonal average PM<sub>2.5</sub> concentrations (ug/m<sup>3</sup>) over the  
466 study period.



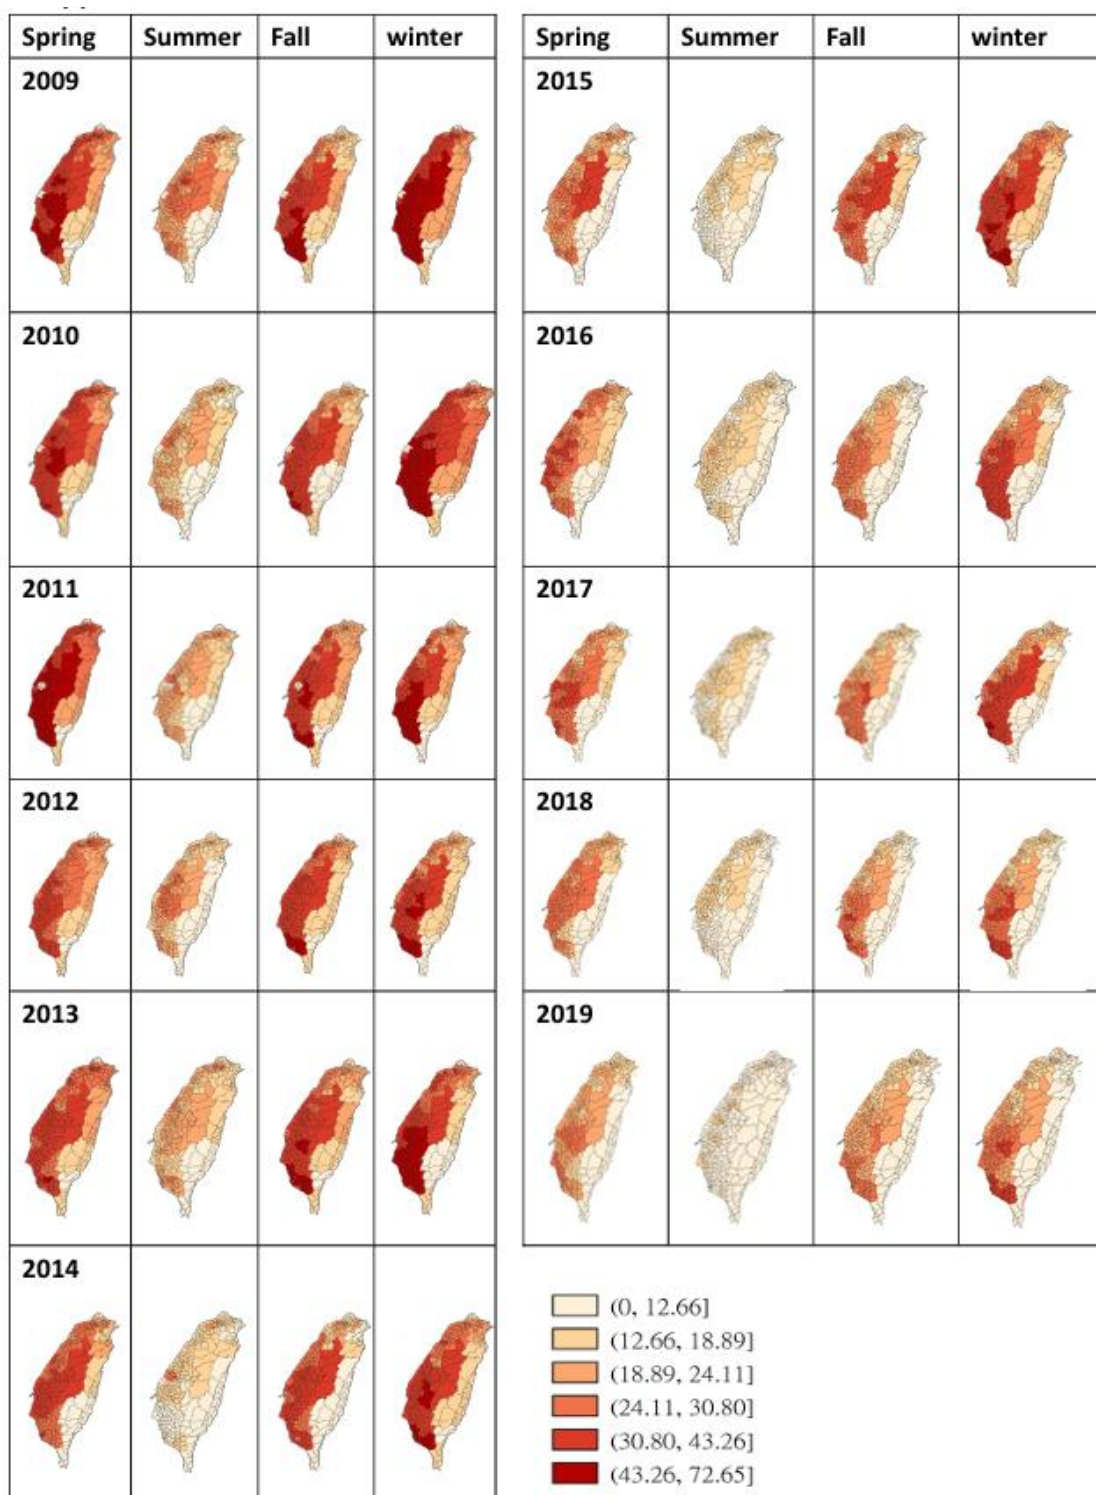

467

**Figure 2 Seasonally adjusted incidence of cardiovascular events**

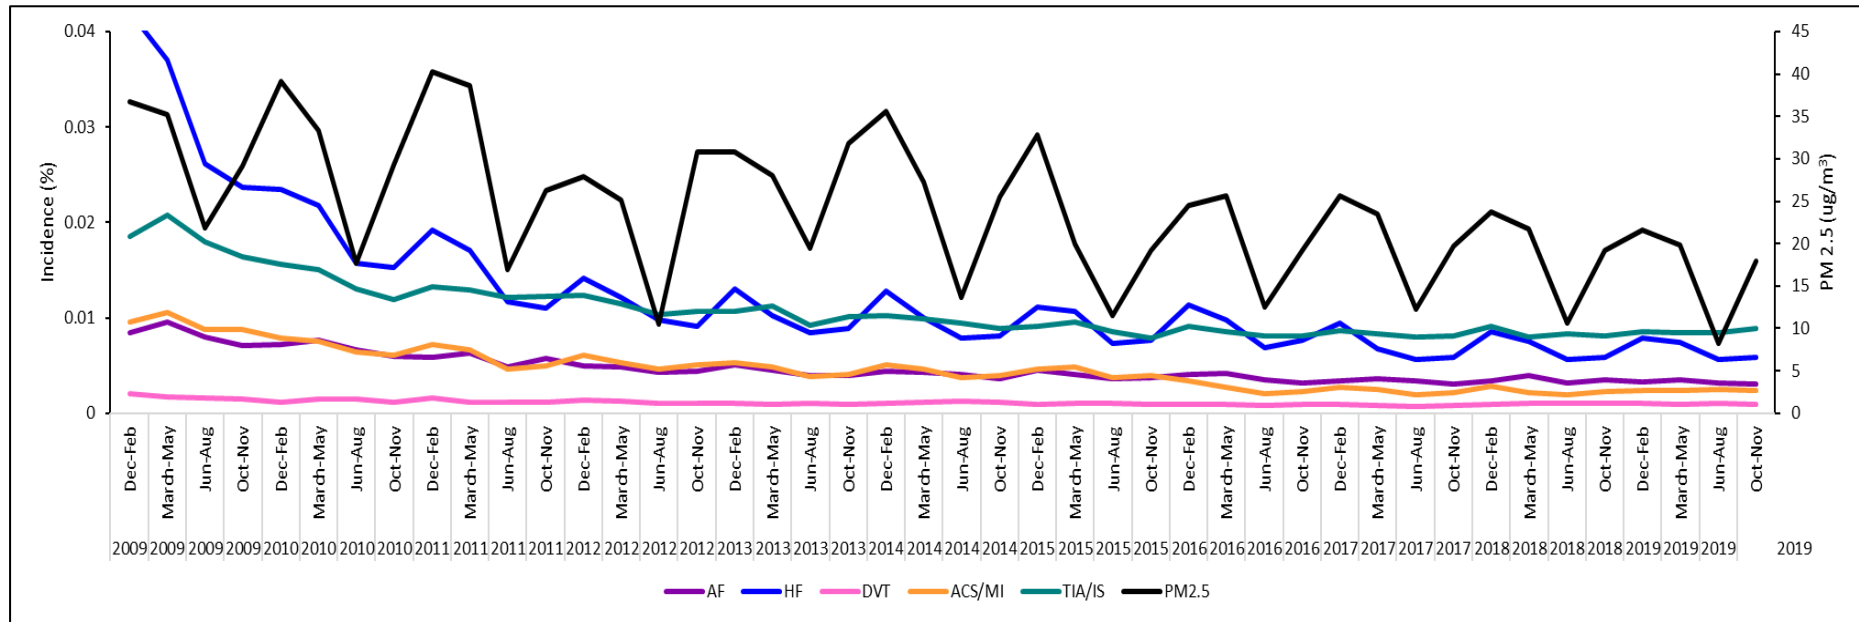

Taiwan started to set the PM2.5 threshold regulation in 2012. It has been set at 15  $\mu\text{g}/\text{m}^3$  from the beginning and remains unchanged. Taiwan began implementing the Air Pollution Prevention and Control Action Plan in December 2017 to reduce the national annual average PM2.5 concentration from 20  $\mu\text{g}/\text{m}^3$  in 2016 to 12.4  $\mu\text{g}/\text{m}^3$  in 2022. (For a detailed report, please refer to the press release of the Ministry of Environment <https://www.moenv.gov.tw/en/AD00D74F752160/b7a33398-f7e6-4938-b868-36204b1c8270> ).

**Figure 3 Hazard ratios estimated by MSM with restricted cubic spline Cox models to evaluate associations between PM<sub>2.5</sub> and cardiovascular events (reference point 15 µg/m<sup>3</sup>)**

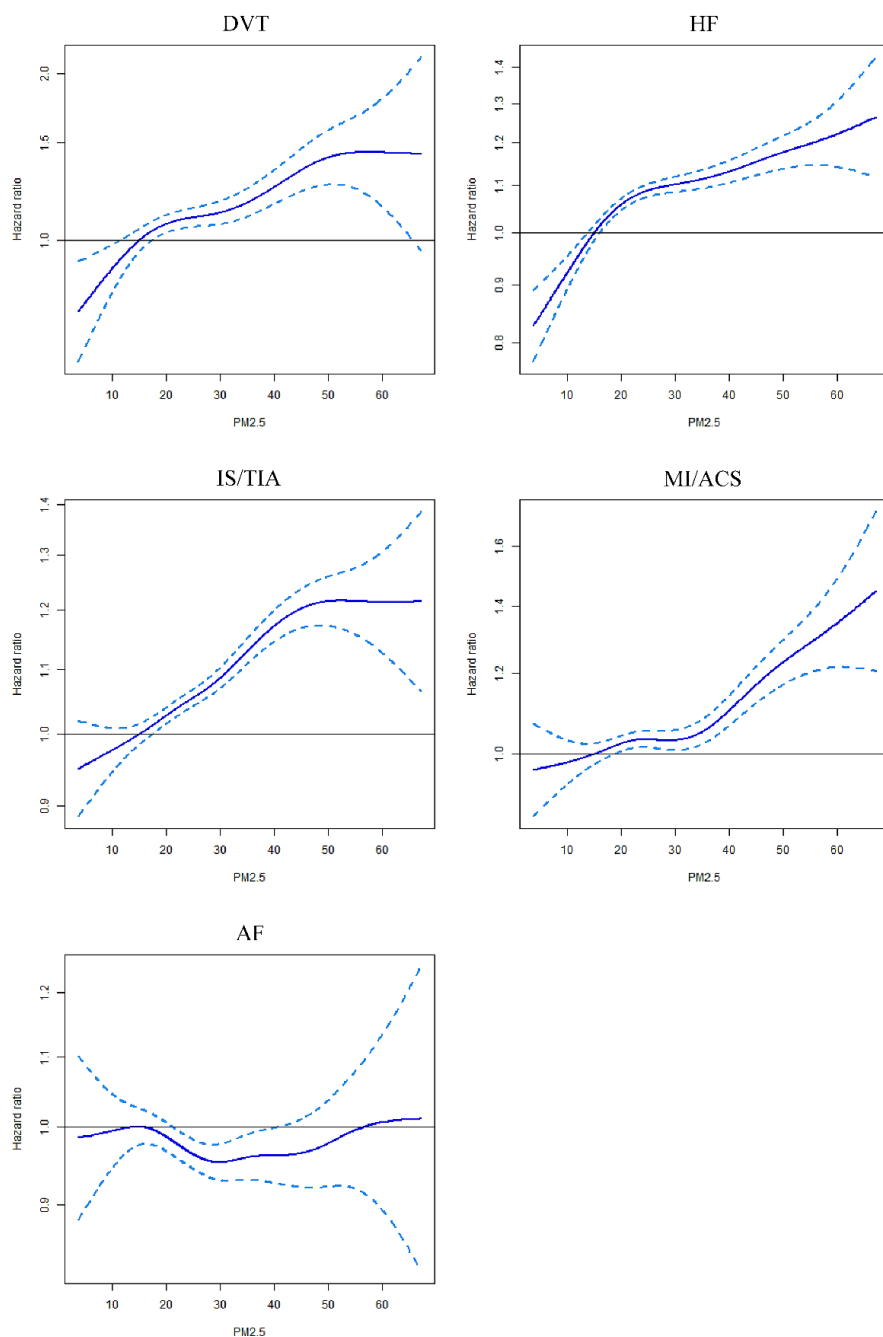

**Figure 4. Forest plot of adjusted hazard ratio of average seasonal PM<sub>2.5</sub> level (< 15ug/m<sup>3</sup>, 15-23.5ug/m<sup>3</sup> and > 23.5 ug/m<sup>3</sup>) as categorical variable for each CV events outcome. Average seasonal PM<sub>2.5</sub> level < 15ug/m<sup>3</sup> was used as reference.**

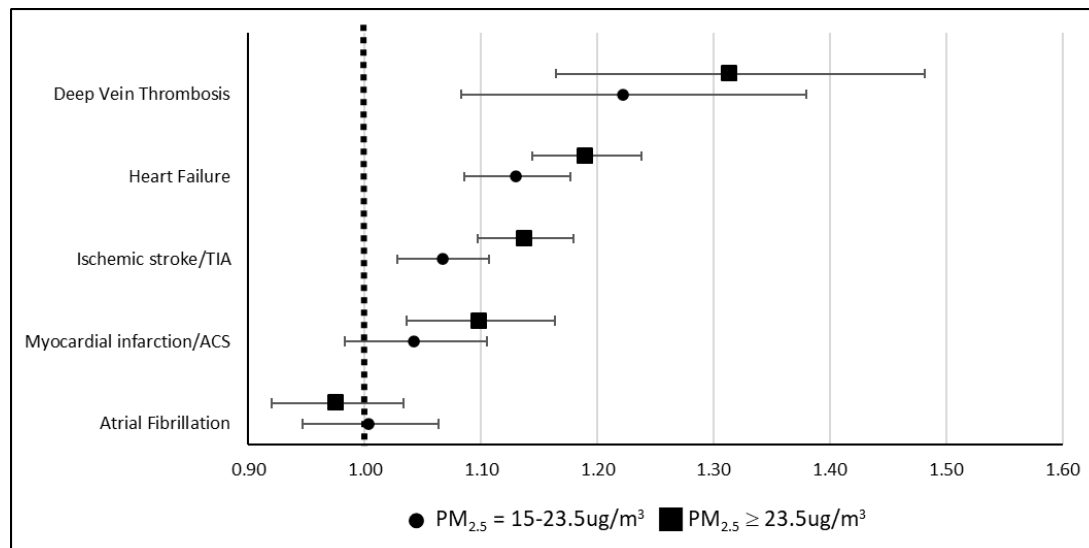

Source: https://www.medrxiv.org/content/10.1101/2024.05.08.24306967v1.full.pdf
